# Supplementary material for: Associations Between PM₂.₅ and PM₁₀ Exposure and Physical and Mental Health: A Comparative Study of Vegetated and Non-Vegetated Zones in Bangladesh
Source: Research Square preprint supplement (doi:10.21203/rs.3.rs-7470759/v1), 2025-09-11
Supplement: Supplementary file 1 [file aa2d5166ddd4fcd5986e7870.pdf]

# Air Quality Impact on Mental and Physical Health Data Collection Sheet

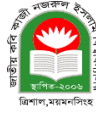

Jatiya Kabi Kazi Nazrul Islam University, Trishal, Mymensingh

Name:

Age (বয়স):

Occupation(পেশা):

Gender

☐

Male

☐

Female

☐

Others

er

(পুরুষ)

(মহিলা)

(অন্যান্য)

(লিঙ্গ)

Residential Area

☐

Greenery

☐

Non-

☐

Partially

(আবাসিক এলাকা)

(সবুজ)

greenery

green

(অসবুজ)

(আংশিক

সবুজ)

## 1) Exposure to Green Space

a) How often do you visit green spaces such as parks, forests, or gardens? (আপনি কতবার পার্ক, বন, বা বাগানের মতো সবুজ স্থানসমূহে যান?)

☐ Daily (দৈনিক) ☐ Weekly (সাপ্তাহিক) ☐ Monthly (মাসিক) ☐ Rarely (মাঝেমাঝে) ☐ Never (কখনোই না)

b) How far do you live from the nearest green space? (আপনার বাড়ি থেকে নিকটস্থ সবুজ স্থানের দূরত্ব কত?)

☐ Less than 1 km (১ কিমি এর কম) ☐ 1-5 km (১-৫ কিমি) ☐ More than 5 km (৫ কিমি এর বেশি)

c) How much time do you spend in green spaces each visit? (আপনি প্রতিবার সবুজ স্থানে কত সময় ব্যয় করেন?)

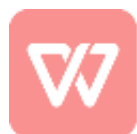

Edit with WPS Office

☐ Less than 30 min (৩০ মিনিট এর কম)
 ☐ 30 - 1 hour (৩০-১ ঘন্টা)
 ☐ 1 - 2 hours (১-২ ঘন্টা)
 ☐ More than 2 ( ২ ঘন্টার বেশি)

d) Do you perceive any changes in air quality when in green spaces versus non-green spaces? (আপনি কি সবুজ ও অ-সবুজ স্থানে বায়ুর মানে কোনো পরিবর্তন অনুভব করেন?)

☐ Yes (হ্যাঁ)
 ☐ No (না)

e) What type of green space do you have access to? (আপনি কোন ধরনের সবুজ স্থানে প্রবেশাধিকার পান?)

☐ Urban (শহরে)
 ☐ Garden (বাগান)
 ☐ Forest (বন)

## 2) Physical Health and Air pollution

a) Do you have any disease related to air quality? (আপনার কি রোগ আছে যা বাতাসের গুণমানের সাথে সম্পর্কিত?) যেঁ রোগ আছে তার উপর টিক দিন, একাধিক হলে একাধিক টিক দিন।

|                        |                                              |                                             |                                         |                                 |                                 |                                   |
|------------------------|----------------------------------------------|---------------------------------------------|-----------------------------------------|---------------------------------|---------------------------------|-----------------------------------|
| a)<br>Asthma<br>(এজমা) | b) Lung<br>Cancer<br>(ফুসুফুসে<br>ক্যান্সার) | c)<br>Cardiovascular<br>Disease<br>(হৃদরোগ) | d)<br>Allergic<br>Rhinitis<br>(এলার্জি) | e)<br>Pneumonia<br>(নিউমোনিয়া) | f) Skin<br>problem<br>(চর্মরোগ) | g) No<br>issue<br>(সমস্যা<br>নেই) |
|------------------------|----------------------------------------------|---------------------------------------------|-----------------------------------------|---------------------------------|---------------------------------|-----------------------------------|

d) Have you noticed any differences in your respiratory symptoms or overall physical health when spending time in green spaces compared to non-green spaces? (আপনি কি সবুজ স্থানে সময় কাটানোর সময় আপনার শ্বাসযন্ত্রের লক্ষণ বা শারীরিক স্বাস্থ্যে কোনো পার্থক্য লক্ষ্য করেছেন?)

☐ Yes (হ্যাঁ)
 ☐ No (না)

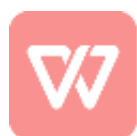

### 3) Mental Health and Well-being

a) How often do you visit green spaces to relax or reduce stress? (আপনি কতবার সবুজ স্থানে আরাম করতে বা চাপ কমাতে যান?)

☐ Daily (দৈনিক) ☐ Weekly (সাপ্তাহিক) ☐ Monthly (মাসিক) ☐ Never  
(কখনো ই না)

b) Have you noticed any improvements in your mental health (e.g., reduced stress, anxiety, depression) after spending time in green spaces? (আপনি কি সবুজ স্থানে সময় কাটানোর পর আপনার মানসিক স্বাস্থ্যে (যেমন চাপ, উদ্বেগ, হতাশা) কোনো উন্নতি লক্ষ্য করেছেন?)

☐ Yes (হ্যাঁ) ☐ No (না)

Scale Analysis: ১ ও ২ পড়ে তারপর বাকি প্রশ্নের উত্তর দিন, আপনার বাসস্থান অনুসারে নির্বাচিত করুন ১ অথবা ২

1. If your home is in green space, do you feel these in your home or outside of non-greenery?

আপনার বাড়ি যদি সবুজ অঞ্চলে থাকে, আপনি কি এগুলো আপনার বাড়িতে বা বাইরে অ-সবুজ এলাকায় অনুভব করেন বা কম অনুভব করেন?

☐

2. If your home is in non-greenery, do you feel these less if you visit any green space, such as a park?

আপনার বাড়ি যদি অ-সবুজ এলাকায় হয়, আপনি কি এগুলো কম অনুভব করেন যদি আপনি কোনো সবুজ এলাকা যেমন পার্কে যান?

☐

► I felt I was close to panic (আমি দুশ্চিন্তাগ্রস্ত অনুভব করি)

☐ Never ☐ Sometimes ☐ Often ☐ Almost  
(কখনো ই না) (মাঝেমধ্যে) (প্রায়ই) Always  
(সবসময়)

► I found it difficult to work up the initiative to do things ( সিদ্ধান্ত বা উদ্যোগ গ্রহন করতে কঠিন মনে হয়)

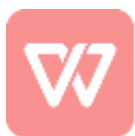

- |                                               |                                                   |                                             |                                                       |
|-----------------------------------------------|---------------------------------------------------|---------------------------------------------|-------------------------------------------------------|
| <input type="checkbox"/> Never<br>(কখনো ই না) | <input type="checkbox"/> Sometimes<br>(মাঝেমধ্যে) | <input type="checkbox"/> Often<br>(প্রায়ই) | <input type="checkbox"/> Almost<br>Always<br>(সবসময়) |
|-----------------------------------------------|---------------------------------------------------|---------------------------------------------|-------------------------------------------------------|

► **I felt down hearted and blue** (মনঃ ক্ষুণ্ণ বা বিষন্ন অনুভব করেন)

- |                                               |                                                   |                                             |                                                       |
|-----------------------------------------------|---------------------------------------------------|---------------------------------------------|-------------------------------------------------------|
| <input type="checkbox"/> Never<br>(কখনো ই না) | <input type="checkbox"/> Sometimes<br>(মাঝেমধ্যে) | <input type="checkbox"/> Often<br>(প্রায়ই) | <input type="checkbox"/> Almost<br>Always<br>(সবসময়) |
|-----------------------------------------------|---------------------------------------------------|---------------------------------------------|-------------------------------------------------------|

► **I was intolerant of anything that kept me from getting on with what I was doing** ( কেউ বা কিছ আপনাকে কাজে বাধা দিলে তার প্রতি আপনি ছিলেন অসহিষ্ণু)

- |                                               |                                                   |                                             |                                                       |
|-----------------------------------------------|---------------------------------------------------|---------------------------------------------|-------------------------------------------------------|
| <input type="checkbox"/> Never<br>(কখনো ই না) | <input type="checkbox"/> Sometimes<br>(মাঝেমধ্যে) | <input type="checkbox"/> Often<br>(প্রায়ই) | <input type="checkbox"/> Almost<br>Always<br>(সবসময়) |
|-----------------------------------------------|---------------------------------------------------|---------------------------------------------|-------------------------------------------------------|

► **I felt that I had nothing to look forward to** ( কোনো কিছু নিয়েই আপনার এখন আর আশা নেই)

- |                                               |                                                   |                                             |                                                       |
|-----------------------------------------------|---------------------------------------------------|---------------------------------------------|-------------------------------------------------------|
| <input type="checkbox"/> Never<br>(কখনো ই না) | <input type="checkbox"/> Sometimes<br>(মাঝেমধ্যে) | <input type="checkbox"/> Often<br>(প্রায়ই) | <input type="checkbox"/> Almost<br>Always<br>(সবসময়) |
|-----------------------------------------------|---------------------------------------------------|---------------------------------------------|-------------------------------------------------------|

► **I felt scared without any good reason** ( কোনো কারণ ছাড়াই আপনি আতঙ্কগ্রস্ত থাকেন)

- |                                               |                                                   |                                             |                                                       |
|-----------------------------------------------|---------------------------------------------------|---------------------------------------------|-------------------------------------------------------|
| <input type="checkbox"/> Never<br>(কখনো ই না) | <input type="checkbox"/> Sometimes<br>(মাঝেমধ্যে) | <input type="checkbox"/> Often<br>(প্রায়ই) | <input type="checkbox"/> Almost<br>Always<br>(সবসময়) |
|-----------------------------------------------|---------------------------------------------------|---------------------------------------------|-------------------------------------------------------|

► **I tended to overreact to situations** ( কোনো বিষয় নিয়ে স্বাভাবিক এর চেয়ে বেশি প্রতিক্রিয়া দেখান)

- |                                               |                                                   |                                             |                                                       |
|-----------------------------------------------|---------------------------------------------------|---------------------------------------------|-------------------------------------------------------|
| <input type="checkbox"/> Never<br>(কখনো ই না) | <input type="checkbox"/> Sometimes<br>(মাঝেমধ্যে) | <input type="checkbox"/> Often<br>(প্রায়ই) | <input type="checkbox"/> Almost<br>Always<br>(সবসময়) |
|-----------------------------------------------|---------------------------------------------------|---------------------------------------------|-------------------------------------------------------|

► **I was worried about situations in which I might panic and make a fool of myself** (কোনো ঘটনা যা আপনাকে বিব্রতকর পরিস্থিতিতে ফেলতে পারে তা নিয়ে চিন্তিত ছিলেন)



- |                                               |                                                   |                                             |                                                       |
|-----------------------------------------------|---------------------------------------------------|---------------------------------------------|-------------------------------------------------------|
| <input type="checkbox"/> Never<br>(কখনো ই না) | <input type="checkbox"/> Sometimes<br>(মাঝেমধ্যে) | <input type="checkbox"/> Often<br>(প্রায়ই) | <input type="checkbox"/> Almost<br>Always<br>(সবসময়) |
|-----------------------------------------------|---------------------------------------------------|---------------------------------------------|-------------------------------------------------------|

► I found it difficult to relax ( চিন্তাগ্রস্ত হলে সহজে শান্ত হতে পারেন না)

- |                                               |                                                   |                                             |                                                       |
|-----------------------------------------------|---------------------------------------------------|---------------------------------------------|-------------------------------------------------------|
| <input type="checkbox"/> Never<br>(কখনো ই না) | <input type="checkbox"/> Sometimes<br>(মাঝেমধ্যে) | <input type="checkbox"/> Often<br>(প্রায়ই) | <input type="checkbox"/> Almost<br>Always<br>(সবসময়) |
|-----------------------------------------------|---------------------------------------------------|---------------------------------------------|-------------------------------------------------------|

► I couldn't seem to experience any positive feelings at all ( কোনো বিষয় নিয়ে ইতিবাচক চিন্তা করতে পারেন না বা সময় প্রয়োজন হয়)

- |                                               |                                                   |                                             |                                                       |
|-----------------------------------------------|---------------------------------------------------|---------------------------------------------|-------------------------------------------------------|
| <input type="checkbox"/> Never<br>(কখনো ই না) | <input type="checkbox"/> Sometimes<br>(মাঝেমধ্যে) | <input type="checkbox"/> Often<br>(প্রায়ই) | <input type="checkbox"/> Almost<br>Always<br>(সবসময়) |
|-----------------------------------------------|---------------------------------------------------|---------------------------------------------|-------------------------------------------------------|

► I felt annoyed by people who criticized my drinking or drug use (if not applicable, mark "not at all") ( যদি মদ্যপান করে থাকেন তাহলে আপনার এ বিষয় নিয়ে আলোচনাকারী এর প্রতি আপনি অসহিষ্ণু, উত্তর দেওয়া আপনার উপর নিরবশর্তীয়)

- |                                               |                                                   |                                             |                                                       |
|-----------------------------------------------|---------------------------------------------------|---------------------------------------------|-------------------------------------------------------|
| <input type="checkbox"/> Never<br>(কখনো ই না) | <input type="checkbox"/> Sometimes<br>(মাঝেমধ্যে) | <input type="checkbox"/> Often<br>(প্রায়ই) | <input type="checkbox"/> Almost<br>Always<br>(সবসময়) |
|-----------------------------------------------|---------------------------------------------------|---------------------------------------------|-------------------------------------------------------|

► I have thoughts of ending my life ( আত্মহত্যার চিন্তা আসে)

- |                                               |                                                   |                                             |                                                       |
|-----------------------------------------------|---------------------------------------------------|---------------------------------------------|-------------------------------------------------------|
| <input type="checkbox"/> Never<br>(কখনো ই না) | <input type="checkbox"/> Sometimes<br>(মাঝেমধ্যে) | <input type="checkbox"/> Often<br>(প্রায়ই) | <input type="checkbox"/> Almost<br>Always<br>(সবসময়) |
|-----------------------------------------------|---------------------------------------------------|---------------------------------------------|-------------------------------------------------------|

4) Opinions and others



Edit with WPS Office

a) In your opinion, what factors affect the air quality in your area? (আপনার মতে, আপনার এলাকার বায়ুর মানের কী কী বিষয় প্রভাব ফেলে?)

b) Do you take any steps to protect yourself from poor air quality in non-green spaces?

(e.g., wearing masks, using air purifiers, staying indoors) (আপনি কি অ-সবুজ স্থানে দূষিত বায়ু থেকে নিজেকে রক্ষা করার জন্য কোনো পদক্ষেপ গ্রহণ করেন?)

(যেমন মাস্ক পরা, এয়ার পিউরিফায়ার ব্যবহার করা, ঘরে থাকা)

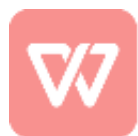

Edit with WPS Office
